# Supplementary material for: Systemic gene therapy rescues retinal dysfunction and hearing loss in a model of Norrie disease
Source: PubMed Central journal article supplement (PMC10565640; doi:10.15252/emmm.202317393), 2023-08-29
Supplement: EMMM-15-e17393-s006.pdf [file EMMM-15-e17393-s006.pdf]

## Expanded View Figures

**Figure EV1. AAV9.NDP vector transduction in the cochlea and retina.**

- A–E Organ of Corti and lateral wall wholemounts stained with anti-GFP antibody. (A–A'') Untreated WT cochlea; (B–B'') P2-L dose; (C–C'') P21-L dose; (D–D'') P21-H dose; (E–E'') P30-H dose. Scale bars = 500  $\mu\text{m}$  (A–E), 500  $\mu\text{m}$  (A'–E'), enlarged view of boxed region shown in A''–E''. SGN, spiral ganglia region; arrowheads, fibrocyte shaped cells in the lateral wall.
- F P30-H dose; cochlea stained with anti-MyoVIIa antibody showing that hair cells are not transduced. Scale bar 100  $\mu\text{m}$ .
- G, H EGFP immunostaining at 2 months in retinal cryosections after AAV9.NDP treatment at P2 (G) and P21 (H); optic nerve: o.n. Arrows indicate transduced region of the retina; arrowheads indicate transduced cells in the RPE. Scale bar 500  $\mu\text{m}$ .

Source data are available online for this figure.

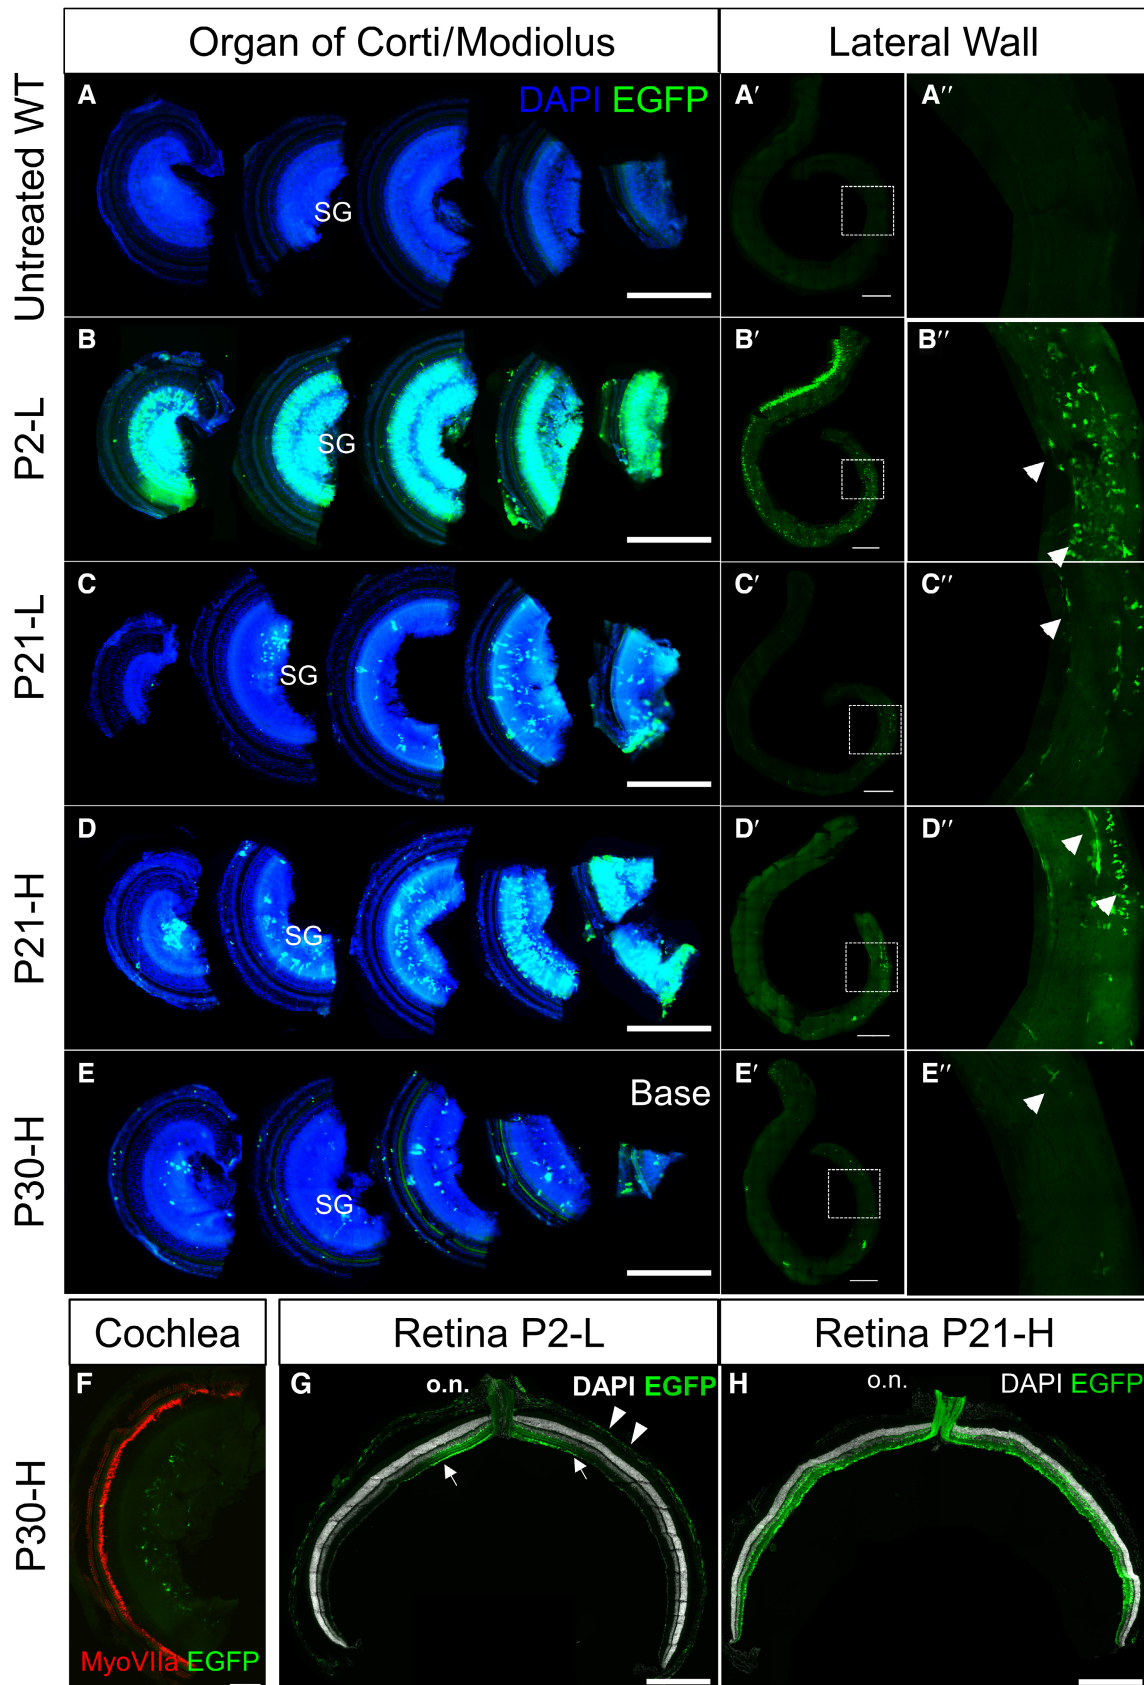

Figure EV1.

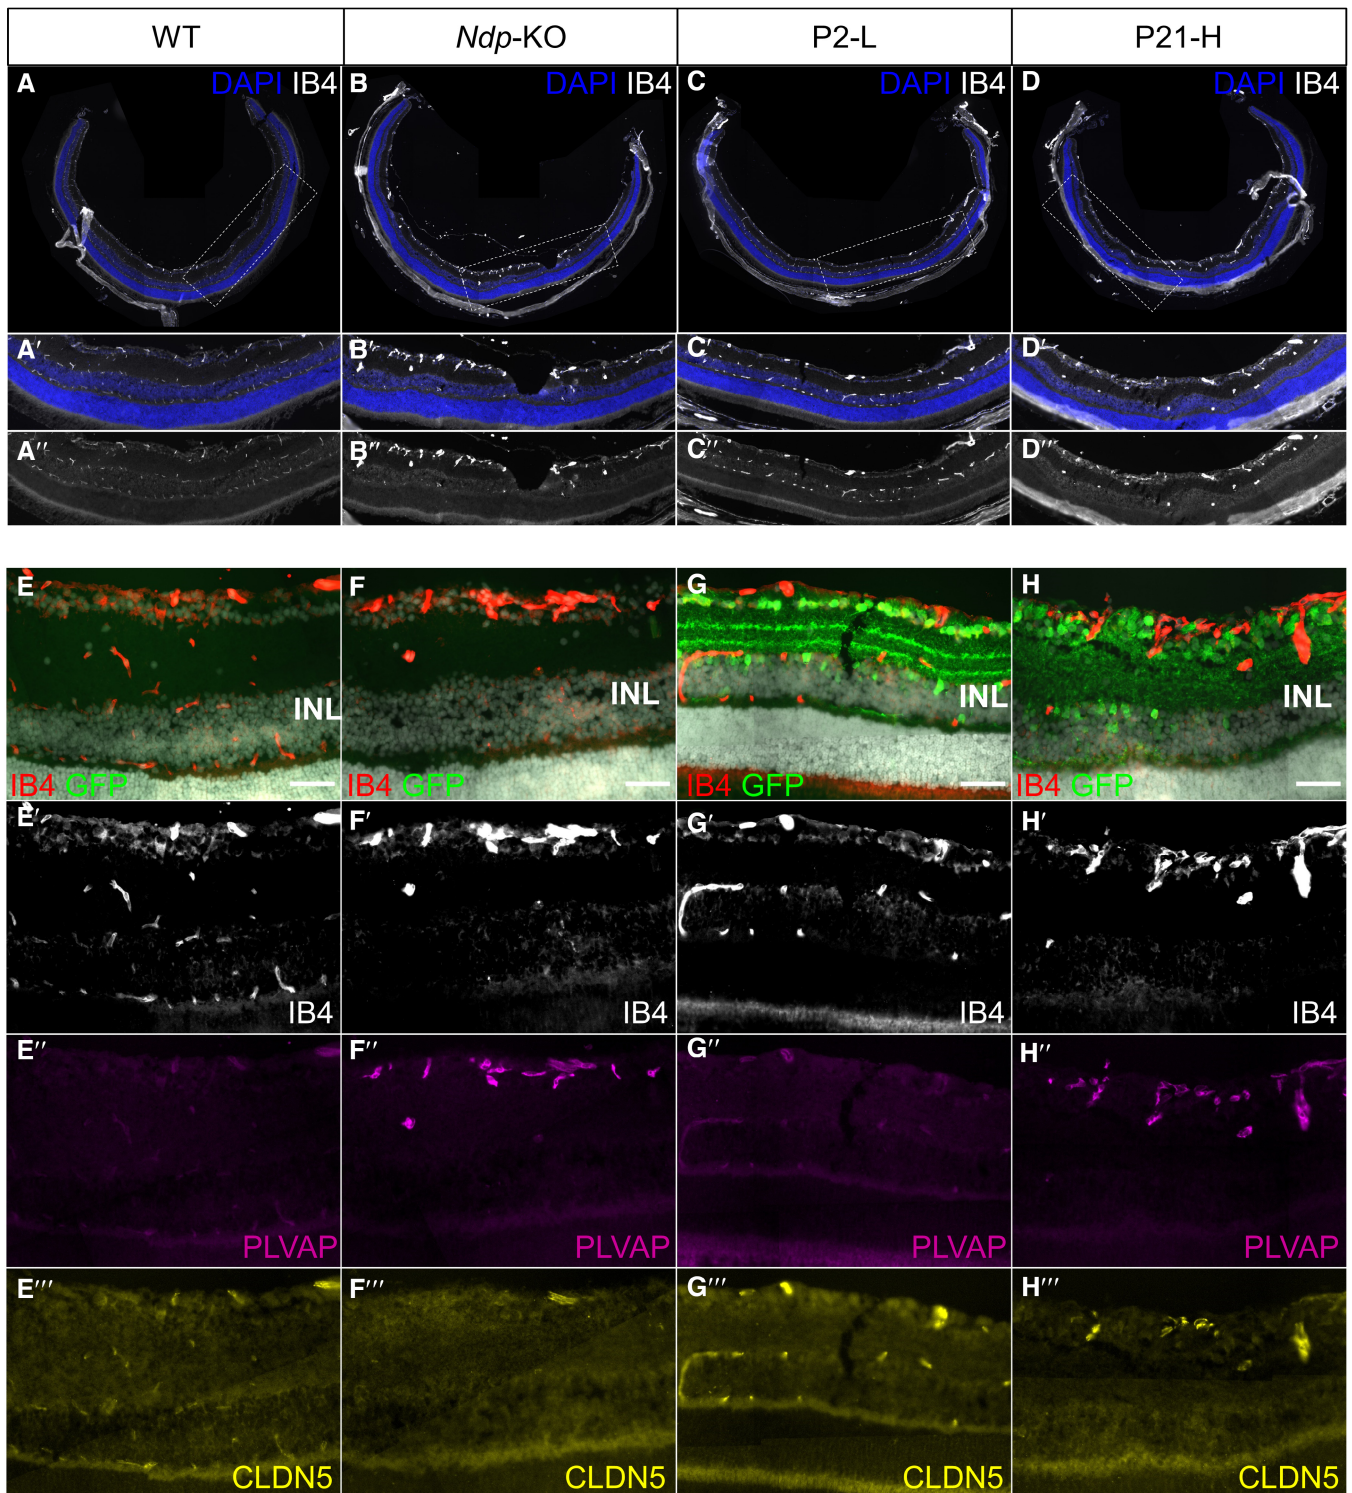

**Figure EV2. Effects of AAV9.NDP treatment on the retinal vessel morphology and barrier proteins.**

A–H Retinal cryosections at 2 months stained with IB4 (A–D, E–G, E–G'), anti-PLVAP and anti-CLDN5 antibodies (E''–G'') and anti-EGFP antibody (E–H). Note the presence of three layers of vessels on WT (A–A', E–E') and P2-L (C–C', G–G') groups and only one layer in *Ndp*-KO (B–B', F–F') and P21-H (D–D', H–H') groups. CLDN5 expression is visible in vessels in WT (E'''), P2-L (G''') and P21-H (H''') groups. Scale bar 50  $\mu$ m (E–H).

Source data are available online for this figure.

**Figure EV3. Electroretinograms showing effects of early and late treatments.**

- A Representative ERG traces in response to flashes of light of increasing intensity (an average of 10 flashes shown for each trace).  
B, C Flash ERG, ratio of b-wave to a-wave amplitude for P2-L and P21-H treatment groups.  
D, E Flash ERG, a-wave amplitudes for P2-L and P21-H treatment groups.

*n* = biological replicates. Data information: *n* (WT) = 10, *n* (*Ndp*-KO) = 10, *n* (P2-L) = 7, *n* (P21-H) = 10. Data are shown as mean ± SD. Statistical analysis was performed by one-way ANOVA with Sidak's *post hoc* test, comparing each treatment group with WT (blue asterisks) and *Ndp*-KO (red asterisks), between WT and *Ndp*-KO (black asterisks). *Post hoc* test values: \**P* ≤ 0.05, \*\**P* ≤ 0.01, \*\*\**P* ≤ 0.001, \*\*\*\**P* ≤ 0.0001; ns, not significant. Source data are available online for this figure.

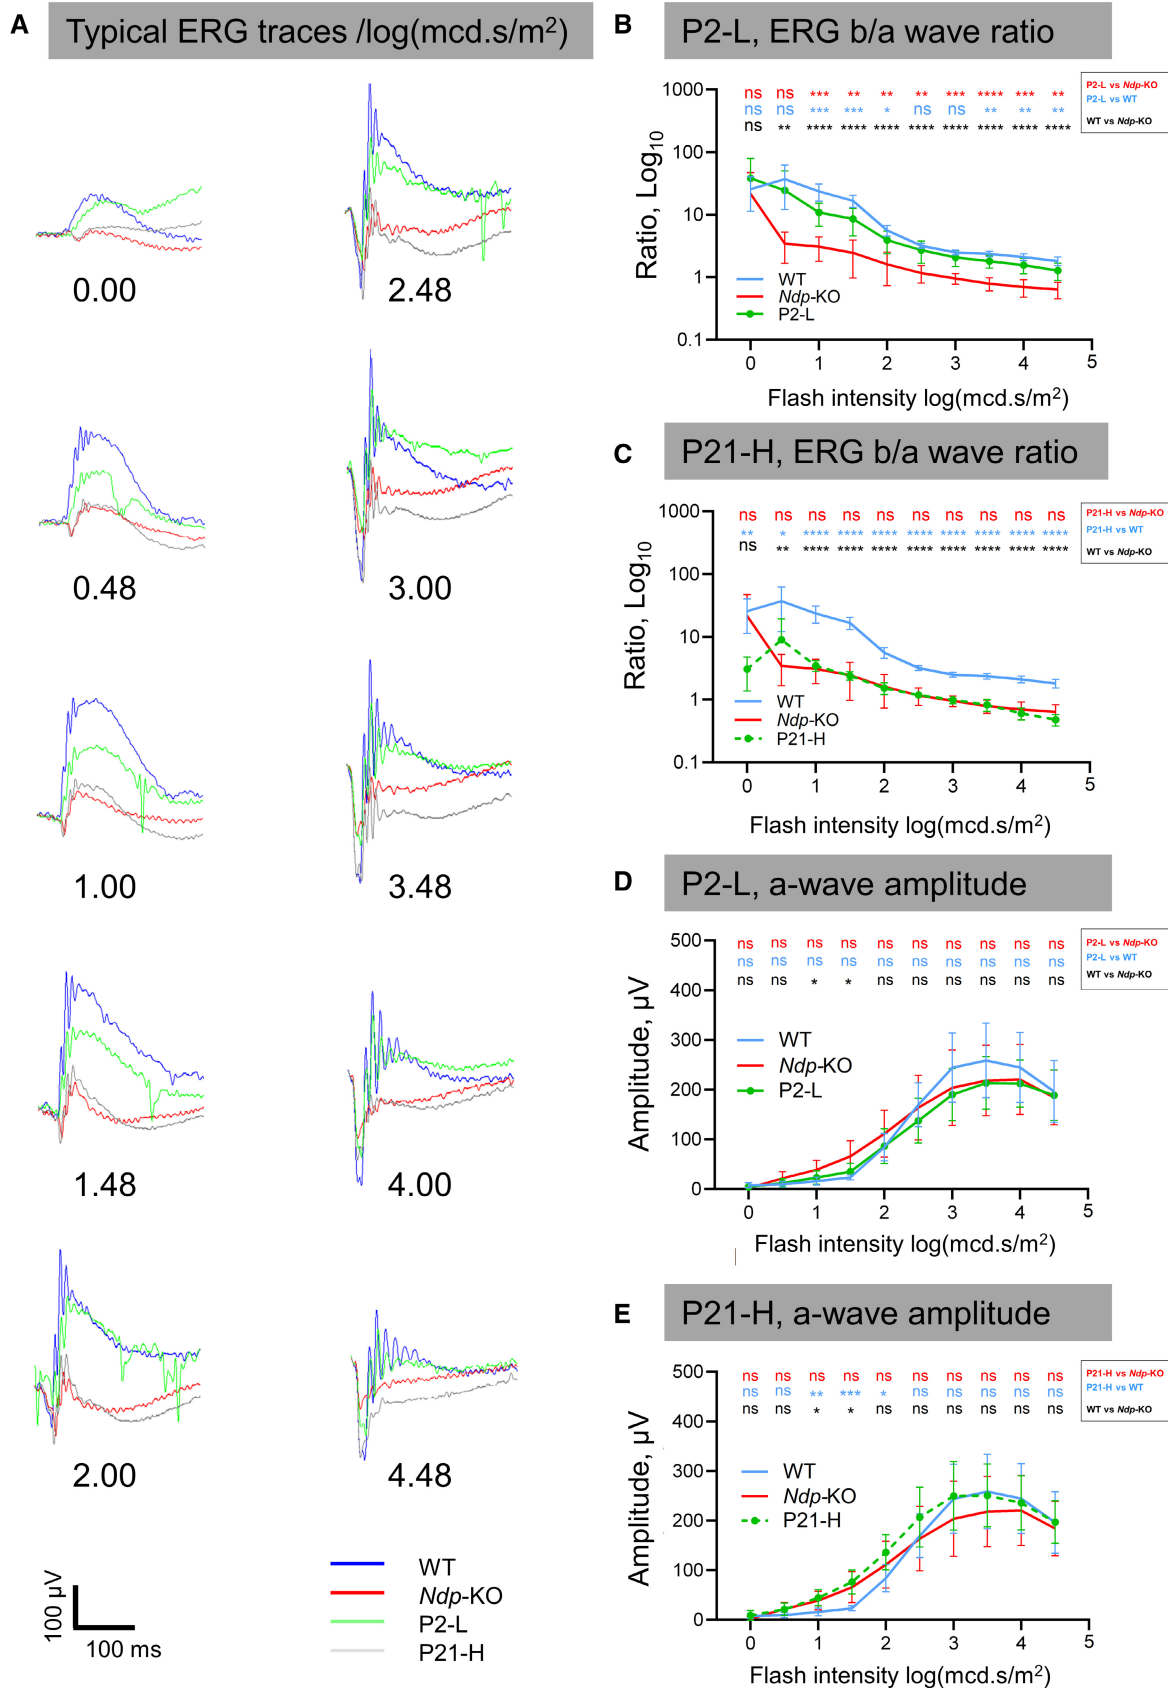

Figure EV3.

**Figure EV4. Differential gene expression in the cochlea by RNA sequencing and qRT-PCR.**

- A Venn diagram showing overlap between *Ndp*-KO versus WT DEGs and *Ndp*-KO versus P2-L DEGs.
- B Heatmap showing levels of expression of the 18 pathology-related DEGs identified between *Ndp*-KO (red) versus P2-L (blue) in WT, *Ndp*-KO and P2-L treated cochleas (green). Note that these genes showed trends of differential expression between *Ndp*-KO and WT cochleas that did not reach significance. No genes were found to be significantly differentially expressed between WT and P2-L cochleas, indicating rescue by the treatment. In heat map, red indicates upregulated and blue indicates downregulated gene expression in *Ndp*-KO.
- C Gene set enrichment analyses of differentially expressed genes between WT and *Ndp*-KO using gene sets were previously defined by transcriptome profiling of FACS sorted CNS vs peripheral endothelial cells (Daneman et al, 2010) and previously used to assess transcriptomes of WT and *Ndp*-KO retinas (Zhou et al, 2014). Gene sets characterising barrier vasculature, BBB1 and 2, BBB endothelial transporters, CNS endothelial and CNS pericyte were significantly positively correlated (FDR < 0.25) with the WT genotype.
- D Dot plot using scRNA seq data of the adult mouse cochlear lateral wall from GEO database: accession numbers GSM5124299, GSM5124300, GSM5124301, and GSM5124302. Gene markers used to distinguish 30 cell type clusters in the UMAP were as previously reported (Gu et al, 2020; Bryant et al, 2022).
- E Dot plot showing expression of the 45 DEGs identified in WT versus *Ndp*-KO analysis in the 30 cell type clusters identified in the adult mouse cochlear lateral wall at the single cell level. Blue arrows indicate endothelial cell genes (*Cldn5*, *Abcb1a* and *Flt1*) downregulated in *Ndp*-KO, and orange arrows indicate upregulated genes in *Ndp*-KO. Box indicates genes significantly different in the P2-L versus *Ndp*-KO comparison. Shaded DEGs are downregulated in the *Ndp*-KO cochlea. Note expression of some DEGs across several different cell type clusters.

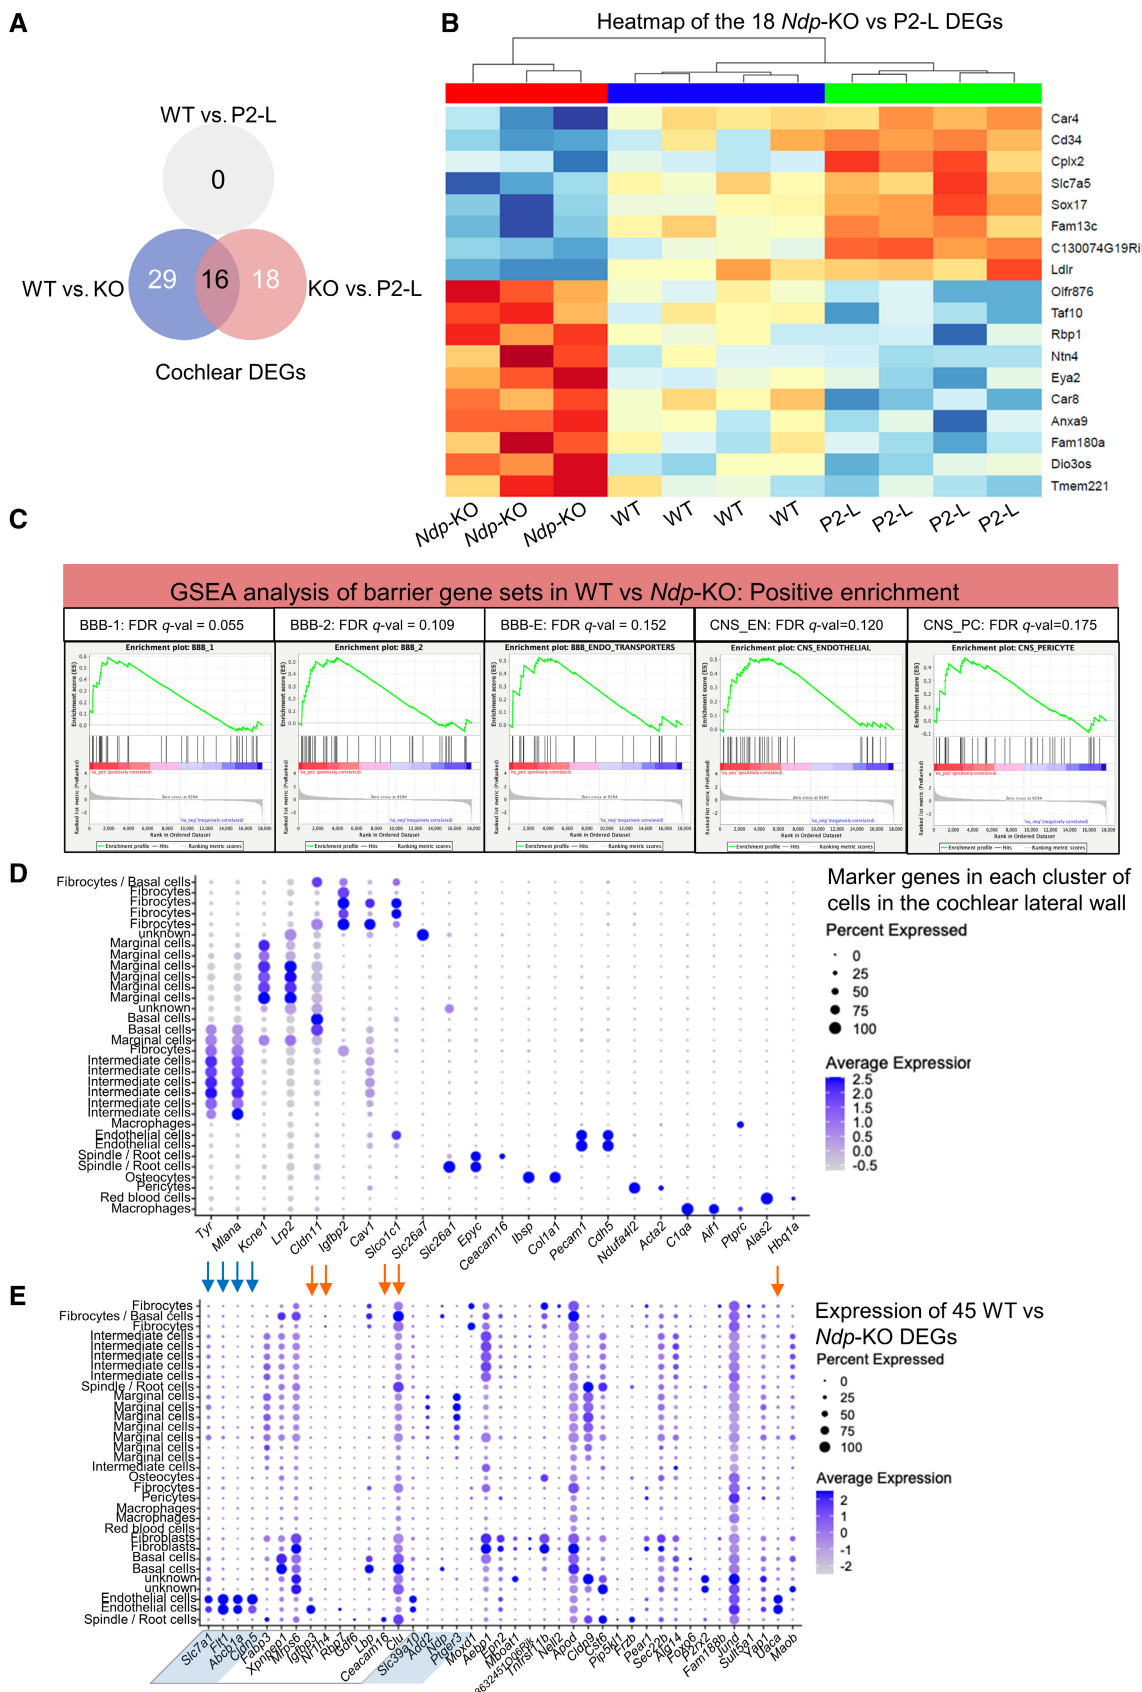

Figure EV4.

**Figure EV5. Statistical analysis of auditory function analysis of DPOAE and ABR thresholds for all groups at 3 months.**

- A, B DPOAE thresholds of P2-L, P30-H and control groups. *P* values indicate statistically significant difference from WT (blue) and *Ndp*-KO (red). *n* = biological replicates. *n* (WT) = 11, *n* (*Ndp*-KO) = 6, *n* (P2-L) = 9, *n* (P30-H) = 8.
- C–E ABR thresholds of P2-L, P-30H and control groups. *P* values (blue) indicate statistically significant difference from WT. *n* = biological replicates. *n* (WT) = 12, *n* (*Ndp*-KO) = 7, *n* (P2-L) = 10, *n* (P21-H) = 8, *n* (P30-H) = 8.
- E ABR wave latency for each treatment group compared to *Ndp*-KO and WT. *n* = biological replicates. *n* (WT) = 12, *n* (*Ndp*-KO) = 7, *n* (P2-L) = 10, *n* (P21-H) = 8, *n* (P30-H) = 8.
- F ABR wave 1 amplitude for each treatment group compared to *Ndp*-KO and WT. *n* = biological replicates. *n* (WT) = 12, *n* (*Ndp*-KO) = 7, *n* (P2-L) = 10, *n* (P21-H) = 8, *n* (P30-H) = 8.

Data information: Data are shown as mean  $\pm$  SD. Statistical analysis was performed by two-way repeated measures ANOVA with Tukey's *post hoc* test, comparing each treatment group with WT (blue asterisks) and *Ndp*-KO (red asterisks), and comparing between WT and *Ndp*-KO (black asterisks). *Post hoc* test values: \**P*  $\leq$  0.05, \*\**P*  $\leq$  0.01, \*\*\**P*  $\leq$  0.001, \*\*\*\**P*  $\leq$  0.0001.

Source data are available online for this figure.



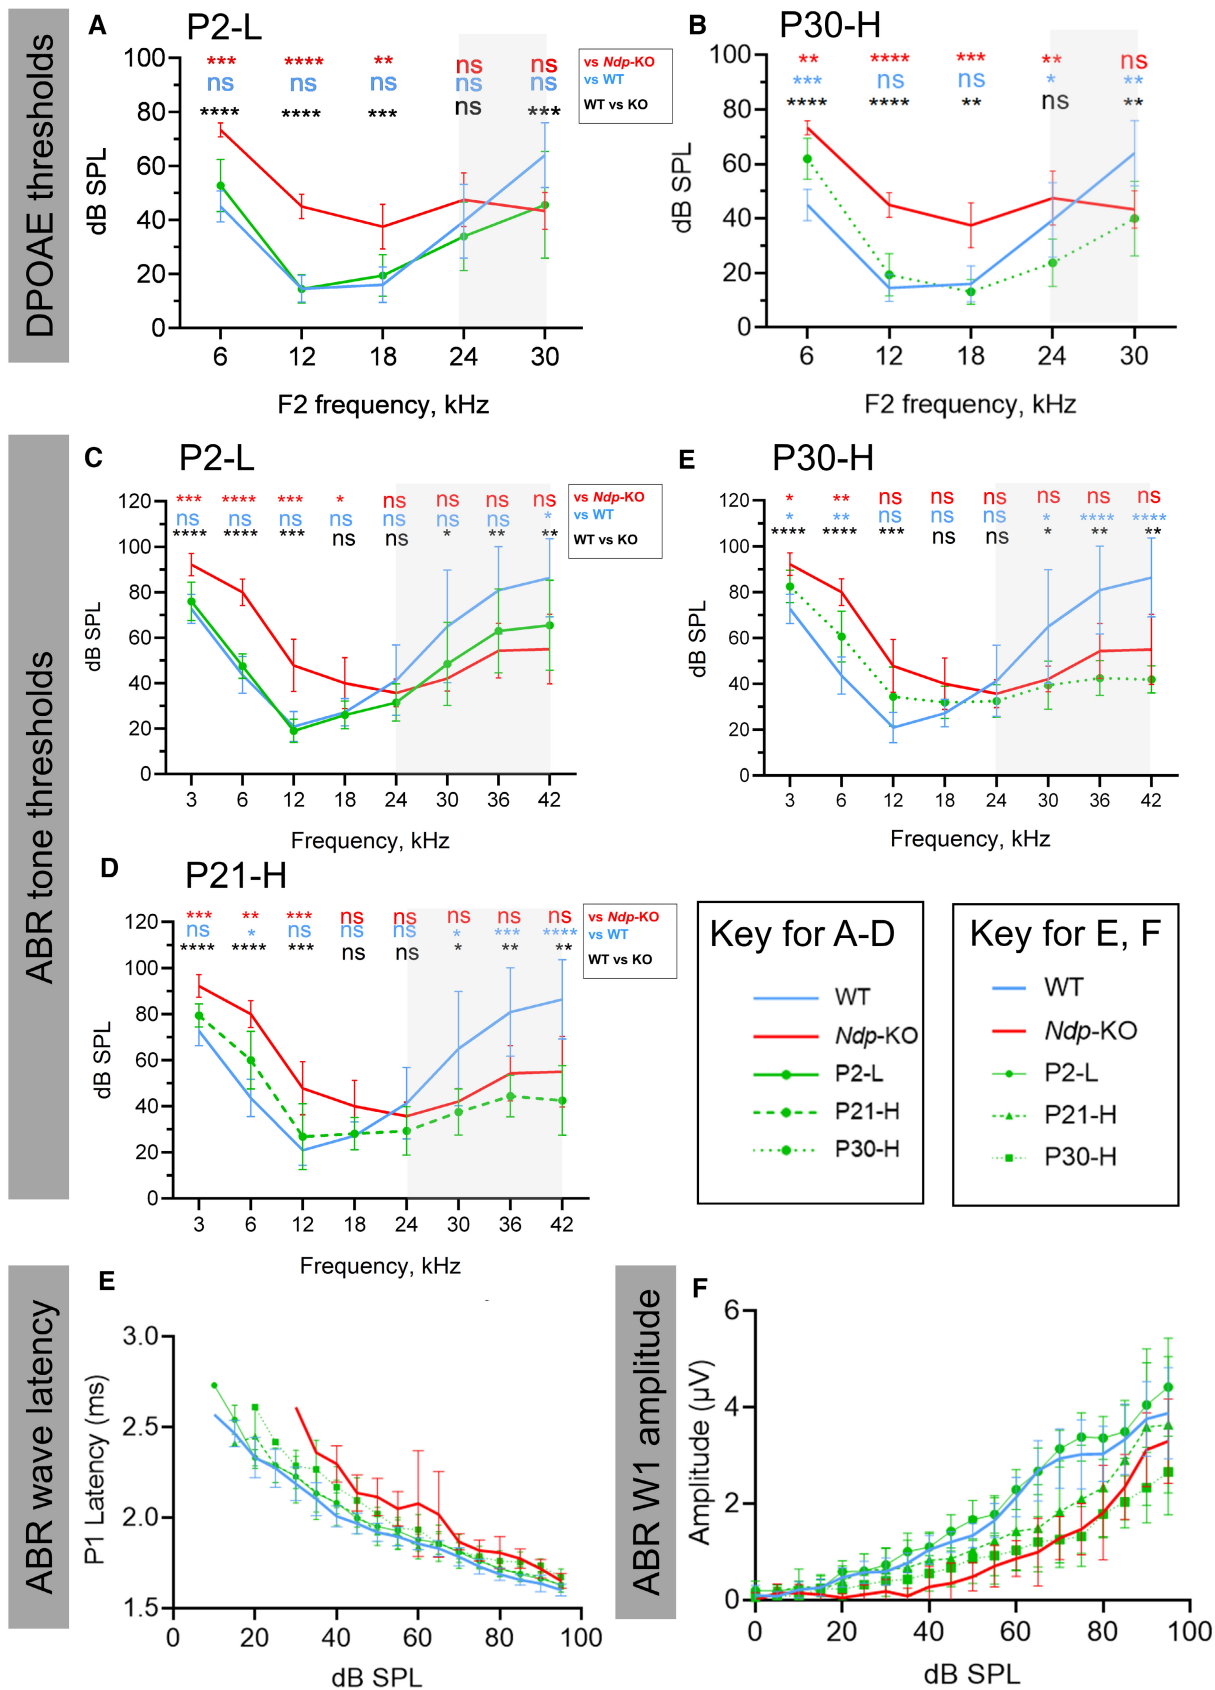

Figure EV5.
